# Supplementary material
Source: ML conference proceedings conference paper supplement (https://proceedings.neurips.cc/paper_files/paper/2019/hash/661c1c090ff5831a647202397c61d73c-Abstract.html)
Supplement: Supplementary file [file 661c1c090ff5831a647202397c61d73c-Supplemental.zip]

## A Proof of Theorem 2

Before we begin the proof, let us introduce more notation. Since we only consider a single critical point, for simplicity of notation we denote the critical point as  $\theta = (\mathbf{w}, \mathbf{V}_1, \mathbf{V}_2, \mathbf{U}_2, \dots, \mathbf{V}_L, \mathbf{U}_L, \mathbf{z})$ , without  $*$ . For  $l \in [2 : L]$ , let  $J_l(x) := \nabla \phi_{\mathbf{z}}^l(\mathbf{U}_l h_{l-1}(x)) \in \mathbb{R}^{n_l \times m_l}$ , i.e.,  $J_l(x)$  is the Jacobian matrix of  $\phi_{\mathbf{z}}^l(\cdot)$  evaluated at  $\mathbf{U}_l h_{l-1}(x)$ , whenever it exists. Also, let  $\mathcal{U} := \text{col}([\mathbf{U}_2^T \ \dots \ \mathbf{U}_L^T]) \subsetneq \mathbb{R}^{d_x}$ .

The proof is divided into two cases: 1) if  $\mathbf{w} \notin \mathcal{U}$ , and 2) if  $\mathbf{w} \in \mathcal{U}$ . For Case 1, we will show that  $\mathfrak{R}(\theta^*) \leq \mathfrak{R}_{\text{lin}}$ ; we also note that our representation coverage condition  $\text{rank}(\mathbb{E}_{(x,y) \sim \mathcal{P}} [\ell''(f_{\theta}(x); y) h_L(x) h_L(x)^T]) = d_x$  is not required for Case 1. For Case 2, we will show that at least one of  $\mathfrak{R}(\theta^*) \leq \mathfrak{R}_{\text{lin}}$  or  $\lambda_{\min}(\nabla^2 \mathfrak{R}(\theta^*)) < 0$  has to hold.

**Case 1: If  $\mathbf{w} \notin \mathcal{U}$ .** From standard matrix calculus, we can calculate the partial derivatives of  $\mathfrak{R}$  with respect to  $\mathbf{w}$  and  $\mathbf{V}_l$ 's. Since  $\theta$  is a critical point we have

$$\begin{aligned} \frac{\partial \mathfrak{R}}{\partial \mathbf{w}}(\theta) &= \mathbb{E}[\ell'(f_{\theta}(x); y) h_L(x)] = \mathbf{0}, \\ \frac{\partial \mathfrak{R}}{\partial \mathbf{V}_l}(\theta) &= \mathbb{E} \left[ \ell'(f_{\theta}(x); y) \prod_{k=l+1}^L (I + \mathbf{U}_k^T J_k(x)^T \mathbf{V}_k^T) \mathbf{w} \phi_{\mathbf{z}}^l(\mathbf{U}_l h_{l-1}(x))^T \right] = \mathbf{0}, \quad l = 2, \dots, L, \\ \frac{\partial \mathfrak{R}}{\partial \mathbf{V}_1}(\theta) &= \mathbb{E} \left[ \ell'(f_{\theta}(x); y) \prod_{k=2}^L (I + \mathbf{U}_k^T J_k(x)^T \mathbf{V}_k^T) \mathbf{w} \phi_{\mathbf{z}}^1(x)^T \right] = \mathbf{0}. \end{aligned}$$

For  $\mathbf{V}_2, \dots, \mathbf{V}_L$ , note that we can arrange terms and express the partial derivatives as

$$\frac{\partial \mathfrak{R}}{\partial \mathbf{V}_l}(\theta) = \mathbf{w} \mathbb{E}[\ell'(f_{\theta}(x); y) \phi_{\mathbf{z}}^l(\mathbf{U}_l h_{l-1}(x))]^T + \sum_{k=l+1}^L \mathbf{U}_k^T E_k = \mathbf{0}, \quad (1)$$

where  $E_k \in \mathbb{R}^{m_l \times n_l}$  are appropriately defined matrices. Note that any column of  $\sum_{k=l+1}^L \mathbf{U}_k^T E_k$  is in  $\mathcal{U}$ . Since  $\mathbf{w} \notin \mathcal{U}$ , the sum being zero (1) implies that  $\mathbb{E}[\ell'(f_{\theta}(x); y) \phi_{\mathbf{z}}^l(\mathbf{U}_l h_{l-1}(x))] = \mathbf{0}$  (because  $\mathbf{w} \notin \mathcal{U}$  already implies that  $\mathbf{w} \neq \mathbf{0}$ ), for all  $l \in [2 : L]$ . Similarly, we have  $\mathbb{E}[\ell'(f_{\theta}(x); y) \phi_{\mathbf{z}}^1(x)] = \mathbf{0}$ .

Now, from  $\mathbb{E}[\ell'(f_{\theta}(x); y) h_L(x)] = \mathbf{0}$ ,

$$\begin{aligned} \mathbf{0} &= \mathbb{E}[\ell'(f_{\theta}(x); y) h_L(x)] \\ &= \mathbb{E}[\ell'(f_{\theta}(x); y) (h_{L-1}(x) + \mathbf{V}_L \phi_{\mathbf{z}}^L(\mathbf{U}_L h_{L-1}(x)))] \\ &= \mathbb{E}[\ell'(f_{\theta}(x); y) h_{L-1}(x)] + \mathbf{V}_L \mathbb{E}[\ell'(f_{\theta}(x); y) \phi_{\mathbf{z}}^L(\mathbf{U}_L h_{L-1}(x))] \\ &= \mathbb{E}[\ell'(f_{\theta}(x); y) h_{L-1}(x)] = \dots = \mathbb{E}[\ell'(f_{\theta}(x); y) x]. \end{aligned}$$

Recall that by convexity,  $\ell(p; y) - \ell(q; y) \leq \ell'(p; y)(p - q)$ . Now for any  $t \in \mathbb{R}^{d_x}$ , we can apply this inequality for  $p = f_{\theta}(x) = \mathbf{w}^T h_L(x)$  and  $q = t^T x$ :

$$\begin{aligned} \mathbb{E}[\ell(f_{\theta}(x); y)] - \mathbb{E}[\ell(t^T x; y)] &\leq \mathbb{E}[\ell'(f_{\theta}(x); y) (\mathbf{w}^T h_L(x) - t^T x)] \\ &= \mathbf{w}^T \mathbb{E}[\ell'(f_{\theta}(x); y) h_L(x)] - t^T \mathbb{E}[\ell'(f_{\theta}(x); y) x] = 0. \end{aligned}$$

Thus,  $\mathbb{E}[\ell(f_{\theta}(x); y)] \leq \mathbb{E}[\ell(t^T x; y)]$  for all  $t$ , so taking infimum over  $t$  gives  $\mathfrak{R}(\theta^*) \leq \mathfrak{R}_{\text{lin}}$ .

**Case 2: If  $\mathbf{w} \in \mathcal{U}$ .** For this case, we will consider the Hessian of  $\mathfrak{R}$  with respect to  $\mathbf{w}$  and  $\mathbf{V}_l$ , for each  $l \in [L]$ . We will show that if  $\mathbb{E}[\ell'(f_{\theta}(x); y) \phi_{\mathbf{z}}^l(\mathbf{U}_l h_{l-1}(x))] \neq \mathbf{0}$ , then  $\lambda_{\min}(\nabla^2 \mathfrak{R}(\theta)) < 0$ . This implies that if  $\mathbb{E}[\ell'(f_{\theta}(x); y) \phi_{\mathbf{z}}^l(\mathbf{U}_l h_{l-1}(x))] = \mathbf{0}$  for all  $l \in [L]$ , then by the same argument as in Case 1 we have  $\mathfrak{R}(\theta^*) \leq \mathfrak{R}_{\text{lin}}$ ; otherwise, we have  $\lambda_{\min}(\nabla^2 \mathfrak{R}(\theta)) < 0$ .

Because  $\theta$  is a twice-differentiable critical point of  $\mathfrak{R}(\cdot)$ , if we apply perturbation  $\delta$  to  $\theta$  and do Taylor expansions, what we get is

$$\mathfrak{R}(\theta + \delta) = \mathfrak{R}(\theta) + \frac{1}{2} \delta^T \nabla^2 \mathfrak{R}(\theta) \delta + o(\|\delta\|^2). \quad (2)$$

So, if we apply a particular form of perturbation  $\delta$ , calculate  $\Re(\theta + \delta)$ , and then show that the sum of all second-order perturbation terms are negative for such a  $\delta$ , it is equivalent to showing  $\frac{1}{2}\delta^T \nabla^2 \Re(\theta) \delta < 0$ , hence  $\lambda_{\min}(\nabla^2 \Re(\theta)) < 0$ .

Now fix any  $l \in [2 : L]$ , and consider perturbing  $w$  by  $\epsilon$  and  $V_l$  by  $\Delta$ , while leaving all other parameters unchanged. We will choose  $\Delta = \alpha\beta^T$ , where  $\alpha \in \mathbb{R}^{d_x}$  is chosen from  $\alpha \in \mathcal{U}^\perp$ , the orthogonal complement of  $\mathcal{U}$ , and  $\beta \in \mathbb{R}^{n_l}$  will be chosen later. We will now compute  $\Re(\theta + \delta)$  directly from the network architecture. The residual block output  $h_1(x), \dots, h_{l-1}(x)$  stays invariant after perturbation because their parameters didn't change. For  $l$ -th residual block, the output after perturbation, denoted as  $\tilde{h}_l(x)$ , becomes

$$\tilde{h}_l(x) = h_l(x) + \Delta \phi_z^l(U_l h_{l-1}(x)).$$

The next residual block output is

$$\begin{aligned} \tilde{h}_{l+1}(x) &= \tilde{h}_l(x) + V_{l+1} \phi_z^{l+1}(U_{l+1} \tilde{h}_l(x)) \\ &= h_l(x) + \Delta \phi_z^l(U_l h_{l-1}(x)) + V_{l+1} \phi_z^{l+1}(U_{l+1} h_l(x) + U_{l+1} \Delta \phi_z^l(U_l h_{l-1}(x))) \\ &\stackrel{(a)}{=} h_l(x) + \Delta \phi_z^l(U_l h_{l-1}(x)) + V_{l+1} \phi_z^{l+1}(U_{l+1} h_l(x)) \\ &= h_{l+1}(x) + \Delta \phi_z^l(U_l h_{l-1}(x)), \end{aligned}$$

where (a) used the fact that  $U_{l+1} \Delta = U_{l+1} \alpha \beta^T = 0$  because  $\alpha \in \mathcal{U}^\perp$ . We can propagate this up to  $\tilde{h}_L(x)$  and similarly show  $\tilde{h}_L(x) = h_L(x) + \Delta \phi_z^L(U_L h_{L-1}(x))$ . Using this, the network output after perturbation, denoted as  $f_{\theta+\delta}(\cdot)$ , is

$$\begin{aligned} f_{\theta+\delta}(x) &= (w + \epsilon)^T (h_L(x) + \Delta \phi_z^L(U_L h_{L-1}(x))) \\ &= f_\theta(x) + \epsilon^T h_L(x) + w^T \Delta \phi_z^L(U_L h_{L-1}(x)) + \epsilon^T \Delta \phi_z^L(U_L h_{L-1}(x)) \\ &\stackrel{(b)}{=} f_\theta(x) + \epsilon^T h_L(x) + \epsilon^T \Delta \phi_z^L(U_L h_{L-1}(x)), \end{aligned}$$

where (b) used  $w^T \Delta = w^T \alpha \beta^T = 0$  because  $w \in \mathcal{U}$  and  $\alpha \in \mathcal{U}^\perp$ . Using this, the risk function value after perturbation is

$$\begin{aligned} \Re(\theta + \delta) &= \mathbb{E}[\ell(f_{\theta+\delta}(x); y)] \\ &= \mathbb{E}[\ell(f_\theta(x) + \epsilon^T h_L(x) + \epsilon^T \Delta \phi_z^L(U_L h_{L-1}(x))); y)] \\ &\stackrel{(c)}{=} \mathbb{E}\left[\ell(f_\theta(x); y) + \ell'(f_\theta(x); y)(\epsilon^T h_L(x) + \epsilon^T \Delta \phi_z^L(U_L h_{L-1}(x)))\right. \\ &\quad \left.+ \frac{1}{2} \ell''(f_\theta(x); y)(\epsilon^T h_L(x))^2 + o(\|\delta\|^2)\right] \\ &\stackrel{(d)}{=} \Re(\theta) + \mathbb{E}\left[\ell'(f_\theta(x); y) \epsilon^T \Delta \phi_z^L(U_L h_{L-1}(x)) + \frac{1}{2} \ell''(f_\theta(x); y)(\epsilon^T h_L(x))^2\right] + o(\|\delta\|^2), \end{aligned}$$

where (c) used Taylor expansion of  $\ell(\cdot; y)$  and (d) used that  $\mathbb{E}[\ell'(f_\theta(x); y) h_L(x)] = \frac{\partial \Re}{\partial w}(\theta) = 0$ . Comparing with the expansion (2), the second term in the RHS corresponds to the second-order perturbation  $\frac{1}{2} \delta^T \nabla^2 \Re(\theta) \delta$ .

Now note that

$$\begin{aligned} &\mathbb{E}\left[\ell'(f_\theta(x); y) \epsilon^T \Delta \phi_z^L(U_L h_{L-1}(x)) + \frac{1}{2} \ell''(f_\theta(x); y)(\epsilon^T h_L(x))^2\right] \\ &= \epsilon^T \Delta \mathbb{E}[\ell'(f_\theta(x); y) \phi_z^L(U_L h_{L-1}(x))] + \frac{1}{2} \epsilon^T \mathbb{E}[\ell''(f_\theta(x); y) h_L(x) h_L(x)^T] \epsilon. \end{aligned}$$

Let  $A := \mathbb{E}[\ell''(f_\theta(x); y) h_L(x) h_L(x)^T]$  and  $b := \mathbb{E}[\ell'(f_\theta(x); y) \phi_z^L(U_L h_{L-1}(x))]$  for simplicity. By the representation coverage condition of the theorem  $A$  is full-rank, hence invertible. We can choose  $\epsilon = -A^{-1} \Delta b$  to minimize the expression above, then the minimum value we get is  $-\frac{1}{2} b^T \Delta^T A^{-1} \Delta b$ .

First, note that  $A$  is positive definite, and so is  $A^{-1}$ . If  $b \neq 0$ , we can choose  $\beta = b$ , so  $\Delta b = \alpha \beta^T b = \|b\|^2 \alpha \neq 0$ , so  $-\frac{1}{2} b^T \Delta^T A^{-1} \Delta b < 0$ . This proves that  $\lambda_{\min}(\nabla^2 \Re(\theta)) < 0$  if  $\mathbb{E}[\ell'(f_\theta(x); y) \phi_z^L(U_L h_{L-1}(x))] \neq 0$ , as desired.

The case when  $l = 1$  can be done similarly, by perturbing  $w$  and  $V_1$ . This finishes the proof.

## B Proof of Theorem 4

Since we only consider a single critical point, we denote the critical point as  $\theta = (w, z)$ , without  $*$ . By the same argument as in Case 1 of Proof of Theorem 2, we can use convexity of  $\ell$  to get the following bound:

$$\begin{aligned} \mathbb{E}[\ell(f_\theta(x); y)] - \mathbb{E}[\ell(\tilde{t}^T x; y)] &\leq \mathbb{E}[\ell'(f_\theta(x); y)(w^T h_L(x) - \tilde{t}^T x)] \\ &= (w - \tilde{t})^T \mathbb{E}[\ell'(f_\theta(x); y) h_L(x)] + \tilde{t}^T \mathbb{E}[\ell'(f_\theta(x); y)(h_L(x) - x)] \\ &\stackrel{(a)}{=} \tilde{t}^T \mathbb{E}\left[\ell'(f_\theta(x); y) \sum_{l=1}^L \phi_z^l(h_{l-1}(x))\right] \\ &\leq \mu \|\tilde{t}\| \sum_{l=1}^L \mathbb{E}[\|\phi_z^l(h_{l-1}(x))\|], \end{aligned}$$

where (a) used the fact that  $\mathbb{E}[\ell'(f_\theta(x); y) h_L(x)] = \frac{\partial \Re}{\partial w} = 0$ . Now, for any fixed  $l \in [L]$ , using Assumption 5.1 we have

$$\begin{aligned} \|\phi_z^l(h_{l-1}(x))\| &\leq \rho_l \|h_{l-1}(x)\| \\ &\leq \rho_l (\|h_{l-2}(x)\| + \|\phi_z^{l-1}(h_{l-2}(x))\|) \\ &\leq \rho_l (1 + \rho_{l-1}) \|h_{l-2}(x)\| \\ &\leq \dots \leq \rho_l \prod_{k=1}^{l-1} (1 + \rho_k) \|x\|. \end{aligned}$$

Substituting this bound to the one above, we get

$$\Re(\theta) - \Re_{\min} \leq \mu \|\tilde{t}\| \mathbb{E}[\|x\|] \sum_{l=1}^L \rho_l \prod_{k=1}^{l-1} (1 + \rho_k) = \mu \|\tilde{t}\| \mathbb{E}[\|x\|] \left( \prod_{k=1}^L (1 + \rho_k) - 1 \right).$$

## C Proof of Theorem 5

First, we collect the symbols used in this section. Given a real number  $p$ , define  $[p]_+ := \max\{p, 0\}$  and  $[p]_- := \max\{-p, 0\}$ . Notice that  $|p| = [p]_+ + [p]_-$ . Recall that given a vector  $x$ , let  $\|x\|$  denotes its Euclidean norm. Recall also that given a matrix  $M$ , let  $\|M\|$  denote its spectral norm, and  $\|M\|_F$  denote its Frobenius norm.

The proof is done by a simple induction argument using the “peeling-off” technique used for Rademacher complexity bounds for neural networks. Before we start, let us define the function class of hidden layer representations, for  $0 \leq l \leq L$ :

$$\mathcal{H}_l := \{h_l : \mathbb{R}^{d_x} \mapsto \mathbb{R}^{d_x} \mid \|V_j\|_F, \|U_j\|_F \leq M_j \text{ for all } j \in [l]\},$$

defined with the same bounds as used in  $\mathcal{F}_L$ . Note that  $\mathcal{H}_0$  is a singleton with the identity mapping  $x \mapsto x$ . Also, define  $\mathcal{F}_l$  to be the class of functions represented by a  $l$ -block ResNet ( $0 \leq l \leq L$ ):

$$\mathcal{F}_l := \{x \mapsto w^T h_l(x) \mid \|w\| \leq 1, h_l \in \mathcal{H}_l\}.$$

Note that if  $l = L$ , this recovers the definition of  $\mathcal{F}_L$  in the theorem statement. Since

$$\mathcal{F}_0 := \{x \mapsto w^T x \mid \|w\| \leq 1\},$$

it is well-known that  $\widehat{\mathcal{R}}_n(\mathcal{F}_0|_S) \leq \frac{B}{\sqrt{n}}$ . The rest of the proof is done by proving the following:

$$\widehat{\mathcal{R}}_n(\mathcal{F}_l|_S) \leq (1 + 2M_l^2) \widehat{\mathcal{R}}_n(\mathcal{F}_{l-1}|_S),$$

for  $l \in [L]$ .

Fix any  $l \in [L]$ . Then, by the definition of Rademacher complexity,

$$\begin{aligned}
n\widehat{\mathcal{R}}_n(\mathcal{F}_l|_S) &= \mathbb{E}_{\epsilon_{1:n}} \left[ \sup_{\substack{\|w\| \leq 1, \\ h_l \in \mathcal{H}_l}} \sum_{i=1}^n \epsilon_i w^T h_l(x_i) \right] \\
&= \mathbb{E}_{\epsilon_{1:n}} \left[ \sup_{\substack{\|w\| \leq 1, \\ h_{l-1} \in \mathcal{H}_{l-1}}} \sup_{\substack{\|\mathbf{V}_l\|_F \leq M_l, \\ \|\mathbf{U}_l\|_F \leq M_l}} \sum_{i=1}^n \epsilon_i w^T (h_{l-1}(x_i) + \mathbf{V}_l \sigma(\mathbf{U}_l h_{l-1}(x_i))) \right] \\
&\leq \underbrace{\mathbb{E}_{\epsilon_{1:n}} \left[ \sup_{\substack{\|w\| \leq 1, \\ h_{l-1} \in \mathcal{H}_{l-1}}} \sum_{i=1}^n \epsilon_i w^T h_{l-1}(x_i) \right]}_{=: \mathcal{A}} + \mathbb{E}_{\epsilon_{1:n}} \left[ \sup_{\substack{\|w\| \leq 1, \\ h_{l-1} \in \mathcal{H}_{l-1}}} \sup_{\substack{\|\mathbf{V}_l\|_F \leq M_l, \\ \|\mathbf{U}_l\|_F \leq M_l}} \sum_{i=1}^n \epsilon_i w^T \mathbf{V}_l \sigma(\mathbf{U}_l h_{l-1}(x_i)) \right].
\end{aligned}$$

The first term in RHS is  $n\widehat{\mathcal{R}}_n(\mathcal{F}_{l-1}|_S)$  by definition. It is left to show an upper bound for the second term in RHS, which we will call  $\mathcal{A}$ .

First, because  $\|w\| \leq 1$  and  $\|\mathbf{V}_l\| \leq \|\mathbf{V}_l\|_F \leq M_l$ , we have  $\|\mathbf{V}_l^T w\| \leq M_l$ . So, by using dual norm,

$$\mathcal{A} = \mathbb{E} \left[ \sup_{\substack{\|v\| \leq M_l, \\ \|\mathbf{U}_l\|_F \leq M_l, \\ h_{l-1} \in \mathcal{H}_{l-1}}} v^T \sum_{i=1}^n \epsilon_i \sigma(\mathbf{U}_l h_{l-1}(x_i)) \right] = M_l \mathbb{E} \left[ \sup_{\substack{\|\mathbf{U}_l\|_F \leq M_l, \\ h_{l-1} \in \mathcal{H}_{l-1}}} \left\| \sum_{i=1}^n \epsilon_i \sigma(\mathbf{U}_l h_{l-1}(x_i)) \right\| \right].$$

Let  $u_1^T, u_2^T, \dots, u_k^T$  be the rows of  $\mathbf{U}_l$ . Then, by positive homogeneity of ReLU  $\sigma$ , we have

$$\left\| \sum_{i=1}^n \epsilon_i \sigma(\mathbf{U}_l h_{l-1}(x_i)) \right\|^2 = \sum_{j=1}^k \|u_j\|^2 \left( \sum_{i=1}^n \epsilon_i \sigma \left( \frac{u_j^T h_{l-1}(x_i)}{\|u_j\|} \right) \right)^2.$$

The supremum of this quantity over  $u_1, \dots, u_k$  under the constraint that  $\|\mathbf{U}_l\|_F^2 = \sum_{j=1}^k \|u_j\|^2 \leq M_l^2$  is attained when  $\|u_j\| = M_l$  for some  $j$  and  $\|u_{j'}\| = 0$  for all other  $j' \neq j$ . This means that

$$\begin{aligned}
\frac{\mathcal{A}}{M_l} &= \mathbb{E} \left[ \sup_{\substack{\|\mathbf{U}_l\|_F \leq M_l, \\ h_{l-1} \in \mathcal{H}_{l-1}}} \left\| \sum_{i=1}^n \epsilon_i \sigma(\mathbf{U}_l h_{l-1}(x_i)) \right\| \right] = \mathbb{E} \left[ \sup_{\substack{\|u\| \leq M_l, \\ h_{l-1} \in \mathcal{H}_{l-1}}} \left| \sum_{i=1}^n \epsilon_i \sigma(u^T h_{l-1}(x_i)) \right| \right] \\
&= \mathbb{E} \left[ \sup_{\substack{\|u\| \leq M_l, \\ h_{l-1} \in \mathcal{H}_{l-1}}} \left[ \sum_{i=1}^n \epsilon_i \sigma(u^T h_{l-1}(x_i)) \right]_+ + \left[ \sum_{i=1}^n \epsilon_i \sigma(u^T h_{l-1}(x_i)) \right]_- \right] \\
&\leq \mathbb{E} \left[ \sup_{\substack{\|u\| \leq M_l, \\ h_{l-1} \in \mathcal{H}_{l-1}}} \left[ \sum_{i=1}^n \epsilon_i \sigma(u^T h_{l-1}(x_i)) \right]_+ \right] + \mathbb{E} \left[ \sup_{\substack{\|u\| \leq M_l, \\ h_{l-1} \in \mathcal{H}_{l-1}}} \left[ \sum_{i=1}^n \epsilon_i \sigma(u^T h_{l-1}(x_i)) \right]_- \right] \\
&\stackrel{(a)}{=} 2 \mathbb{E} \left[ \sup_{\substack{\|u\| \leq M_l, \\ h_{l-1} \in \mathcal{H}_{l-1}}} \left[ \sum_{i=1}^n \epsilon_i \sigma(u^T h_{l-1}(x_i)) \right]_+ \right] \stackrel{(b)}{=} 2 \mathbb{E} \left[ \left[ \sup_{\substack{\|u\| \leq M_l, \\ h_{l-1} \in \mathcal{H}_{l-1}}} \sum_{i=1}^n \epsilon_i \sigma(u^T h_{l-1}(x_i)) \right]_+ \right] \\
&\stackrel{(c)}{=} 2 \mathbb{E} \left[ \sup_{\substack{\|u\| \leq M_l, \\ h_{l-1} \in \mathcal{H}_{l-1}}} \sum_{i=1}^n \epsilon_i \sigma(u^T h_{l-1}(x_i)) \right] \stackrel{(d)}{\leq} 2 \mathbb{E} \left[ \sup_{\substack{\|u\| \leq M_l, \\ h_{l-1} \in \mathcal{H}_{l-1}}} \sum_{i=1}^n \epsilon_i u^T h_{l-1}(x_i) \right],
\end{aligned}$$

where equality (a) is due to symmetry of Rademacher random variables and (b) uses  $\sup [t]_+ = [\sup t]_+$ . Equality (c) uses the fact that the supremum is nonnegative, because setting  $u = 0$

already gives  $\sum_{i=1}^n \epsilon_i \sigma(u^T h_{l-1}(x_i)) = 0$ . Inequality (d) uses contraction property of Rademacher complexity.

Lastly, one can notice that

$$\mathbb{E} \left[ \sup_{\substack{\|u\| \leq M_l, \\ h_{l-1} \in \mathcal{H}_{l-1}}} \sum_{i=1}^n \epsilon_i u^T h_{l-1}(x_i) \right] = M_l \mathbb{E} \left[ \sup_{\substack{\|w\| \leq 1, \\ h_{l-1} \in \mathcal{H}_{l-1}}} \sum_{i=1}^n \epsilon_i w^T h_{l-1}(x_i) \right] = M_l n \widehat{\mathcal{R}}_n(\mathcal{F}_{l-1}|_S).$$

This establishes

$$\mathcal{A} \leq 2M_l^2 n \widehat{\mathcal{R}}_n(\mathcal{F}_{l-1}|_S),$$

which leads to the conclusion that

$$\widehat{\mathcal{R}}_n(\mathcal{F}_l|_S) \leq (1 + 2M_l^2) \widehat{\mathcal{R}}_n(\mathcal{F}_{l-1}|_S),$$

as desired.
